# Supplementary material for: Norwegian population norms for the EQ-5D-5L: results from a general population survey
Source: Qual Life Res. 2021 Jul 16;31(2):517–26. doi: 10.1007/s11136-021-02938-7 (PMC8284681; doi:10.1007/s11136-021-02938-7)
Supplement: Supplementary file 1 — Supplementary file1 (XLSX 67 kb) [file 11136_2021_2938_MOESM1_ESM.xlsx]

## Sheet: Table 1
rownames	Cat_name	category	n	prop	N	PROP	wn	wprop		PROP = proportion in the general population for Norway
1	Sex									prop = proportion in the study sample
2		Male	1407	0.450962	2123224	0.501453	1564.53	0.501453
3		Female	1713	0.549038	2110920	0.498547	1555.47	0.498547
4	Age, years
5		18-29	691	0.221474	834674	0.197129	615.044	0.197129
6		30-39	385	0.123397	722966	0.170747	532.73	0.170747
7		40-49	368	0.117949	720185	0.17009	530.68	0.17009
8		50-59	453	0.145192	701419	0.165658	516.852	0.165658
9		60-69	484	0.155128	582212	0.137504	429.013	0.137504
10		70-79	500	0.160256	436830	0.103168	321.886	0.103168
11		80+	239	0.0766026	235858	0.0557038	173.796	0.0557038
12	Education
13		Below upper secondary education	282	0.0903846	989729	0.233749	729.298	0.233749
14		Upper secondary education	1215	0.389423	1738531	0.410598	1281.07	0.410598
15		Higher education, short	761	0.24391	1057700	0.249803	779.384	0.249803
16		Higher education, long	862	0.276282	448184	0.10585	330.252	0.10585

## Sheet: Table 2
rownames	Health state	n	w	prop	wprop	rankn	rankw
1	11111	1006	930.437	0.322436	0.298217	1	1
6	11121	704	660.888	0.225641	0.211823	2	2
7	11122	271	261.823	0.086859	0.0839176	3	3
2	11112	158	140.234	0.050641	0.0449468	4	4
77	21121	60	53.289	0.0192308	0.0170798	5	8
24	11221	51	55.3844	0.0163462	0.0177514	6	7
8	11123	46	59.2321	0.0147436	0.0189846	7	5
25	11222	44	55.6991	0.0141026	0.0178523	8	6
86	21221	38	37.63	0.0121795	0.0120609	9	11
10	11131	36	38.9905	0.0115385	0.012497	10	10
3	11113	30	25.9321	0.00961538	0.00831157	11.5	16
11	11132	30	49.8806	0.00961538	0.0159874	11.5	9
78	21122	26	32.2038	0.00833333	0.0103217	13	12
26	11223	24	27.1779	0.00769231	0.00871086	14	14
28	11231	22	26.9028	0.00705128	0.0086227	15	15
87	21222	20	28.9525	0.00641026	0.00927965	16	13
29	11232	16	19.2266	0.00512821	0.00616236	18	20
89	21231	16	12.597	0.00512821	0.0040375	18	22
90	21232	16	17.301	0.00512821	0.00554518	18	21
20	11211	15	20.2701	0.00480769	0.00649683	20	17
80	21131	13	10.1103	0.00416667	0.00324047	21	26
88	21223	12	19.9926	0.00384615	0.00640788	22	18
12	11133	10	11.4287	0.00320513	0.00366305	23	23
21	11212	9	6.77226	0.00288462	0.0021706	25	37
75	21111	9	7.11042	0.00288462	0.00227898	25	35
121	22231	9	8.71856	0.00288462	0.00279441	25	29
22	11213	8	6.45718	0.0025641	0.00206961	27	39
4	11114	7	10.1986	0.00224359	0.00326877	29.5	24
9	11124	7	7.99727	0.00224359	0.00256323	29.5	31
30	11233	7	8.77517	0.00224359	0.00281255	29.5	28
91	21233	7	7.44757	0.00224359	0.00238704	29.5	33
14	11141	6	9.67801	0.00192308	0.00310192	33.5	27
27	11224	6	19.8761	0.00192308	0.00637053	33.5	19
81	21132	6	3.81868	0.00192308	0.00122393	33.5	59
104	21333	6	5.17122	0.00192308	0.00165744	33.5	48
93	21241	5	5.08419	0.00160256	0.00162955	37	49
118	22221	5	10.1703	0.00160256	0.00325972	37	25
122	22232	5	7.41464	0.00160256	0.00237649	37	34
15	11142	4	4.20055	0.00128205	0.00134633	45	56
40	11322	4	3.50122	0.00128205	0.00112219	45	64

## Sheet: Table 3 unweighted
rownames	18-29.n	18-29.prop	30-39.n	30-39.prop	40-49.n	40-49.prop	50-59.n	50-59.prop	60-69.n	60-69.prop	70-79.n	70-79.prop	80+.n	80+.prop	All.n	All.prop
Mobility.1	629	0.910275	362	0.94026	317	0.861413	387	0.854305	399	0.82438	372	0.744	131	0.548117	2597	0.832372
Mobility.2	46	0.0665702	18	0.0467532	37	0.100543	43	0.0949227	54	0.11157	85	0.17	55	0.230126	338	0.108333
Mobility.3	10	0.0144718	4	0.0103896	12	0.0326087	17	0.0375276	16	0.0330579	24	0.048	25	0.104603	108	0.0346154
Mobility.4	5	0.00723589	1	0.0025974	2	0.00543478	5	0.0110375	15	0.0309917	16	0.032	21	0.0878661	65	0.0208333
Mobility.5	1	0.00144718	0	0	0	0	1	0.00220751	0	0	3	0.006	7	0.0292887	12	0.00384615
Self-Care.1	675	0.976845	374	0.971429	353	0.959239	420	0.927152	453	0.93595	457	0.914	191	0.799163	2923	0.936859
Self-Care.2	10	0.0144718	9	0.0233766	8	0.0217391	25	0.0551876	24	0.0495868	30	0.06	29	0.121339	135	0.0432692
Self-Care.3	5	0.00723589	2	0.00519481	6	0.0163043	7	0.0154525	4	0.00826446	10	0.02	10	0.041841	44	0.0141026
Self-Care.4	1	0.00144718	0	0	1	0.00271739	1	0.00220751	2	0.00413223	3	0.006	6	0.0251046	14	0.00448718
Self-Care.5	0	0	0	0	0	0	0	0	1	0.00206612	0	0	3	0.0125523	4	0.00128205
Usual Activities.1	559	0.808973	340	0.883117	282	0.766304	355	0.783664	397	0.820248	402	0.804	141	0.589958	2476	0.79359
Usual Activities.2	88	0.127352	34	0.0883117	53	0.144022	67	0.147903	60	0.123967	65	0.13	56	0.23431	423	0.135577
Usual Activities.3	26	0.0376266	7	0.0181818	23	0.0625	17	0.0375276	14	0.0289256	14	0.028	24	0.100418	125	0.0400641
Usual Activities.4	14	0.0202605	3	0.00779221	7	0.0190217	14	0.0309051	13	0.0268595	16	0.032	9	0.0376569	76	0.024359
Usual Activities.5	4	0.00578871	1	0.0025974	3	0.00815217	0	0	0	0	3	0.006	9	0.0376569	20	0.00641026
Pain/Discomfort.1	351	0.507959	201	0.522078	140	0.380435	166	0.366446	176	0.363636	171	0.342	66	0.276151	1271	0.407372
Pain/Discomfort.2	271	0.392185	148	0.384416	164	0.445652	210	0.463576	235	0.485537	247	0.494	125	0.523013	1400	0.448718
Pain/Discomfort.3	50	0.0723589	28	0.0727273	44	0.119565	50	0.110375	49	0.10124	55	0.11	37	0.154812	313	0.100321
Pain/Discomfort.4	13	0.0188133	7	0.0181818	17	0.0461957	22	0.0485651	20	0.0413223	22	0.044	9	0.0376569	110	0.0352564
Pain/Discomfort.5	6	0.00868307	1	0.0025974	3	0.00815217	5	0.0110375	4	0.00826446	5	0.01	2	0.0083682	26	0.00833333
Anxiety/Depression.1	400	0.578871	249	0.646753	242	0.657609	303	0.668874	373	0.770661	385	0.77	170	0.711297	2122	0.680128
Anxiety/Depression.2	180	0.260492	95	0.246753	87	0.236413	115	0.253863	80	0.165289	91	0.182	53	0.221757	701	0.224679
Anxiety/Depression.3	76	0.109986	33	0.0857143	27	0.0733696	28	0.0618102	25	0.0516529	20	0.04	13	0.0543933	222	0.0711538
Anxiety/Depression.4	29	0.0419682	6	0.0155844	9	0.0244565	7	0.0154525	6	0.0123967	3	0.006	3	0.0125523	63	0.0201923
Anxiety/Depression.5	6	0.00868307	2	0.00519481	3	0.00815217	0	0	0	0	1	0.002	0	0	12	0.00384615

## Sheet: Table 3 weighted
rownames	18-29.n	18-29.prop	30-39.n	30-39.prop	40-49.n	40-49.prop	50-59.n	50-59.prop	60-69.n	60-69.prop	70-79.n	70-79.prop	80+.n	80+.prop	All.n	All.prop
Mobility.1	552.589	0.898456	494.904	0.928997	432.28	0.814578	417.833	0.808418	348.502	0.812335	225.105	0.699332	86.3616	0.496914	2557.57	0.819736
Mobility.2	39.3327	0.063951	25.9507	0.0487127	68.3197	0.12874	63.4866	0.122833	52.7958	0.123063	65.212	0.202594	43.9564	0.252919	359.054	0.115081
Mobility.3	9.67167	0.0157252	10.5636	0.0198292	22.9945	0.0433301	25.3716	0.0490886	12.2914	0.0286504	17.8913	0.0555829	20.8435	0.119931	119.627	0.0383421
Mobility.4	12.5614	0.0204236	1.31123	0.00246134	7.08593	0.0133525	9.07944	0.0175668	15.4237	0.0359515	11.537	0.0358421	16.7113	0.096155	73.7101	0.023625
Mobility.5	0.888504	0.00144462	0	0	0	0	1.08191	0.00209328	0	0	2.14033	0.00664934	5.92317	0.0340812	10.0339	0.003216
Self-Care.1	592.797	0.96383	508.887	0.955244	498.217	0.938827	466.095	0.901796	401.78	0.936523	290.469	0.902397	134.555	0.774213	2892.8	0.92718
Self-Care.2	13.8298	0.0224859	15.5688	0.0292245	11.9211	0.0224638	35.7078	0.069087	20.1131	0.0468824	21.8724	0.0679508	22.8495	0.131473	141.863	0.0454688
Self-Care.3	7.88404	0.0128187	8.27413	0.0155316	15.1915	0.0286265	13.9672	0.0270235	3.48665	0.00812715	6.87104	0.0213462	8.66488	0.0498566	64.3394	0.0206216
Self-Care.4	0.532564	0.000865896	0	0	5.35088	0.0100831	1.08191	0.00209328	3.22868	0.00752584	2.67342	0.00830552	5.80277	0.0333884	18.6702	0.00598405
Self-Care.5	0	0	0	0	0	0	0	0	0.403817	0.00094127	0	0	1.92371	0.0110688	2.32753	0.000746002
Usual Activities.1	469.86	0.763947	454.078	0.852362	378.167	0.712608	372.423	0.72056	344.635	0.803322	250.317	0.777659	94.2372	0.542229	2363.72	0.757602
Usual Activities.2	94.4548	0.153574	59.8811	0.112404	90.3365	0.170228	101.386	0.196161	59.0199	0.137572	46.8765	0.145631	43.7368	0.251656	495.692	0.158876
Usual Activities.3	26.5416	0.043154	14.6334	0.0274687	45.9889	0.0866603	26.916	0.0520768	14.7398	0.0343576	8.84556	0.0274805	19.4287	0.111791	157.094	0.0503507
Usual Activities.4	16.9534	0.0275646	2.8256	0.005304	12.6675	0.0238702	16.1267	0.0312018	10.6176	0.0247488	13.1298	0.0407904	8.38917	0.0482703	80.7098	0.0258685
Usual Activities.5	7.23328	0.0117606	1.31123	0.00246134	3.52043	0.0066338	0	0	0	0	2.71662	0.00843972	8.00406	0.0460543	22.7856	0.00730308
Pain/Discomfort.1	301.676	0.490495	242.785	0.455738	166.356	0.313477	180.556	0.349338	150.284	0.350302	97.4516	0.302752	43.5001	0.250294	1182.61	0.379041
Pain/Discomfort.2	250.249	0.40688	224.65	0.421696	256.015	0.482428	218.901	0.423527	203.179	0.473596	162.428	0.504615	88.9019	0.511531	1404.32	0.450104
Pain/Discomfort.3	39.4204	0.0640936	49.5835	0.0930743	67.1321	0.126502	75.0088	0.145126	44.5631	0.103874	39.1191	0.121531	30.5986	0.176061	345.425	0.110713
Pain/Discomfort.4	10.8909	0.0177075	14.4001	0.0270308	33.6929	0.06349	37.0505	0.0716848	25.8536	0.0602629	19.3867	0.0602287	8.87771	0.0510812	150.152	0.0481258
Pain/Discomfort.5	12.8077	0.0208241	1.31123	0.00246134	7.48422	0.0141031	5.33578	0.0103236	5.13309	0.0119649	3.5	0.0108734	1.91757	0.0110335	37.4896	0.0120159
Anxiety/Depression.1	349.231	0.567815	326.049	0.612035	333.88	0.629154	334.027	0.646272	316.89	0.73865	240.103	0.745926	116.264	0.668968	2016.44	0.646296
Anxiety/Depression.2	143.174	0.232787	133.785	0.251131	120.689	0.227422	129.528	0.250609	77.9348	0.181661	66.2783	0.205906	44.7811	0.257665	716.169	0.229542
Anxiety/Depression.3	82.9177	0.134816	45.2253	0.0848935	50.5107	0.095181	39.8753	0.0771502	27.3949	0.0638556	12.1007	0.0375931	9.557	0.0549898	267.582	0.0857633
Anxiety/Depression.4	35.813	0.0582283	19.1192	0.0358892	18.2188	0.0343309	13.4222	0.0259692	6.79269	0.0158333	2.72047	0.00845167	3.19391	0.0183774	99.2803	0.0318206
Anxiety/Depression.5	3.90726	0.00635282	8.55136	0.016052	7.38286	0.0139121	0	0	0	0	0.683159	0.00212237	0	0	20.5246	0.00657841

## Sheet: Table 4 unweighted
rownames	18-29.n	18-29.prop	30-39.n	30-39.prop	40-49.n	40-49.prop	50-59.n	50-59.prop	60-69.n	60-69.prop	70-79.n	70-79.prop	80+.n	80+.prop	All.n	All.prop
Mobility.1	407	0.896476	213	0.926087	191	0.852679	198	0.842553	220	0.846154	133	0.678571	56	0.491228	1418	0.827788
Mobility.2	37	0.0814978	13	0.0565217	24	0.107143	25	0.106383	26	0.1	43	0.219388	30	0.263158	198	0.115587
Mobility.3	9	0.0198238	3	0.0130435	8	0.0357143	7	0.0297872	7	0.0269231	13	0.0663265	14	0.122807	61	0.03561
Mobility.4	1	0.00220264	1	0.00434783	1	0.00446429	4	0.0170213	7	0.0269231	5	0.0255102	12	0.105263	31	0.0180969
Mobility.5	0	0	0	0	0	0	1	0.00425532	0	0	2	0.0102041	2	0.0175439	5	0.00291886
Self-Care.1	443	0.975771	223	0.969565	215	0.959821	217	0.923404	249	0.957692	185	0.943878	89	0.780702	1621	0.946293
Self-Care.2	7	0.0154185	6	0.026087	6	0.0267857	11	0.0468085	7	0.0269231	6	0.0306122	14	0.122807	57	0.033275
Self-Care.3	3	0.00660793	1	0.00434783	3	0.0133929	6	0.0255319	3	0.0115385	4	0.0204082	8	0.0701754	28	0.0163456
Self-Care.4	1	0.00220264	0	0	0	0	1	0.00425532	1	0.00384615	1	0.00510204	3	0.0263158	7	0.0040864
Self-Care.5	0	0	0	0	0	0	0	0	0	0	0	0	0	0	0	0
Usual Activities.1	363	0.799559	202	0.878261	163	0.727679	183	0.778723	210	0.807692	149	0.760204	60	0.526316	1330	0.776416
Usual Activities.2	62	0.136564	21	0.0913043	38	0.169643	31	0.131915	36	0.138462	34	0.173469	31	0.27193	253	0.147694
Usual Activities.3	17	0.0374449	4	0.0173913	15	0.0669643	9	0.0382979	7	0.0269231	5	0.0255102	15	0.131579	72	0.0420315
Usual Activities.4	10	0.0220264	2	0.00869565	6	0.0267857	12	0.0510638	7	0.0269231	6	0.0306122	5	0.0438596	48	0.028021
Usual Activities.5	2	0.00440529	1	0.00434783	2	0.00892857	0	0	0	0	2	0.0102041	3	0.0263158	10	0.00583771
Pain/Discomfort.1	218	0.480176	110	0.478261	87	0.388393	76	0.323404	94	0.361538	57	0.290816	22	0.192982	664	0.387624
Pain/Discomfort.2	181	0.398678	94	0.408696	92	0.410714	119	0.506383	128	0.492308	95	0.484694	61	0.535088	770	0.449504
Pain/Discomfort.3	39	0.0859031	22	0.0956522	30	0.133929	21	0.0893617	25	0.0961538	32	0.163265	23	0.201754	192	0.112084
Pain/Discomfort.4	12	0.0264317	3	0.0130435	13	0.0580357	15	0.0638298	10	0.0384615	11	0.0561224	7	0.0614035	71	0.0414478
Pain/Discomfort.5	4	0.00881057	1	0.00434783	2	0.00892857	4	0.0170213	3	0.0115385	1	0.00510204	1	0.00877193	16	0.00934034
Anxiety/Depression.1	244	0.537445	145	0.630435	146	0.651786	147	0.625532	196	0.753846	140	0.714286	75	0.657895	1093	0.638062
Anxiety/Depression.2	131	0.288546	61	0.265217	60	0.267857	66	0.280851	45	0.173077	46	0.234694	29	0.254386	438	0.255692
Anxiety/Depression.3	56	0.123348	23	0.1	12	0.0535714	17	0.0723404	16	0.0615385	9	0.0459184	8	0.0701754	141	0.0823117
Anxiety/Depression.4	19	0.0418502	1	0.00434783	5	0.0223214	5	0.0212766	3	0.0115385	1	0.00510204	2	0.0175439	36	0.0210158
Anxiety/Depression.5	4	0.00881057	0	0	1	0.00446429	0	0	0	0	0	0	0	0	5	0.00291886

## Sheet: Table 4 weighted
rownames	18-29.n	18-29.prop	30-39.n	30-39.prop	40-49.n	40-49.prop	50-59.n	50-59.prop	60-69.n	60-69.prop	70-79.n	70-79.prop	80+.n	80+.prop	All.n	All.prop
Mobility.1	262.906	0.880934	242.658	0.932151	210.019	0.812607	195.14	0.772755	171.582	0.801688	108.242	0.651605	47.8116	0.45281	1238.36	0.796133
Mobility.2	26.5256	0.088881	12.7505	0.0489801	35.7786	0.138435	33.5555	0.13288	28.5998	0.133628	40.822	0.245743	29.1527	0.276097	207.185	0.133198
Mobility.3	8.78316	0.0294303	3.60068	0.0138317	10.9182	0.0422449	14.6764	0.0581185	5.07365	0.0237058	10.3672	0.0624093	14.7339	0.139541	68.1532	0.0438153
Mobility.4	0.225124	0.000754337	1.31123	0.00503699	1.73504	0.00671325	8.07133	0.0319625	8.77037	0.0409781	5.27474	0.0317533	11.7285	0.111077	37.1163	0.0238619
Mobility.5	0	0	0	0	0	0	1.08191	0.00428439	0	0	1.41012	0.00848878	2.16184	0.0204742	4.65388	0.00299195
Self-Care.1	285.027	0.955057	253.162	0.972501	243.371	0.941652	218.917	0.866913	204.11	0.95367	155.459	0.935842	79.2528	0.750581	1439.3	0.925316
Self-Care.2	11.1643	0.0374089	5.84728	0.0224619	8.58032	0.033199	20.0379	0.0793502	5.07365	0.0237058	6.26795	0.0377323	14.6801	0.139032	71.6516	0.0460643
Self-Care.3	1.71588	0.00574952	1.31123	0.00503699	6.49986	0.0251493	12.4879	0.0494523	2.85661	0.013347	3.12969	0.0188404	7.82661	0.0741236	35.8278	0.0230335
Self-Care.4	0.532564	0.00178449	0	0	0	0	1.08191	0.00428439	1.98558	0.00927729	1.26006	0.00758543	3.82901	0.0362635	8.68913	0.00558619
Self-Care.5	0	0	0	0	0	0	0	0	0	0	0	0	0	0	0	0
Usual Activities.1	222.52	0.745611	230.843	0.886764	173.098	0.669754	177.95	0.704682	162.58	0.759629	124.568	0.749883	51.3455	0.486279	1142.9	0.734766
Usual Activities.2	56.0836	0.187923	22.3191	0.0857369	49.9721	0.193352	44.4401	0.175983	38.6732	0.180694	29.7475	0.179076	30.0382	0.284484	271.274	0.1744
Usual Activities.3	9.76275	0.0327126	4.91191	0.0188687	23.3719	0.0904306	16.4956	0.0653225	5.86953	0.0274244	3.05474	0.0183891	14.385	0.136236	77.8514	0.0500502
Usual Activities.4	9.00829	0.0301846	0.935367	0.00359314	10.1216	0.0391627	13.6394	0.0540119	6.90291	0.0322527	6.75982	0.0406933	5.99086	0.0567377	53.3582	0.0343037
Usual Activities.5	1.06513	0.00356899	1.31123	0.00503699	1.88674	0.00730019	0	0	0	0	1.98642	0.011958	3.82901	0.0362635	10.0785	0.00647943
Pain/Discomfort.1	136.854	0.458565	111.357	0.427769	82.7161	0.320046	78.3929	0.310436	68.5308	0.320198	45.4949	0.273874	20.1764	0.191085	543.522	0.349427
Pain/Discomfort.2	124.315	0.416551	105.716	0.406102	113.701	0.439934	112.322	0.444796	106.027	0.495395	81.9112	0.493096	54.5303	0.516442	698.524	0.449077
Pain/Discomfort.3	25.0197	0.0838349	38.8456	0.149222	41.0884	0.15898	29.373	0.116317	22.8793	0.1069	26.1743	0.157566	21.8436	0.206875	205.224	0.131937
Pain/Discomfort.4	10.0024	0.0335155	3.09015	0.0118706	18.8116	0.0727861	28.1092	0.111313	12.6986	0.0593318	11.5427	0.0694856	7.76187	0.0735105	92.0165	0.0591568
Pain/Discomfort.5	2.24845	0.00753401	1.31123	0.00503699	2.13334	0.00825432	4.32766	0.0171375	3.88998	0.0181753	0.993211	0.00597901	1.27634	0.0120878	16.1802	0.0104022
Anxiety/Depression.1	157.853	0.528927	162.365	0.623711	159.131	0.61571	157.021	0.621804	153.787	0.718545	117.625	0.708086	64.8788	0.614449	972.66	0.625317
Anxiety/Depression.2	83.0043	0.278128	74.2335	0.285162	73.6631	0.285018	62.1398	0.246074	40.5239	0.189341	40.5553	0.244138	30.6904	0.29066	404.81	0.26025
Anxiety/Depression.3	37.5428	0.125797	22.1556	0.0851091	17.3652	0.0671896	21.9581	0.0869541	16.82	0.0785886	6.6763	0.0401905	7.46673	0.0707154	129.985	0.0835664
Anxiety/Depression.4	17.9096	0.0600109	1.5665	0.00601757	7.89341	0.0305412	11.406	0.0451679	2.89481	0.0135255	1.26006	0.00758543	2.55267	0.0241757	45.4831	0.0292408
Anxiety/Depression.5	2.13026	0.00713797	0	0	0.398292	0.00154107	0	0	0	0	0	0	0	0	2.52855	0.00162559

## Sheet: Table 5 unweighted
rownames	18-29.n	18-29.prop	30-39.n	30-39.prop	40-49.n	40-49.prop	50-59.n	50-59.prop	60-69.n	60-69.prop	70-79.n	70-79.prop	80+.n	80+.prop	All.n	All.prop
Mobility.1	222	0.936709	149	0.96129	126	0.875	189	0.866972	179	0.799107	239	0.786184	75	0.6	1179	0.837953
Mobility.2	9	0.0379747	5	0.0322581	13	0.0902778	18	0.0825688	28	0.125	42	0.138158	25	0.2	140	0.0995025
Mobility.3	1	0.00421941	1	0.00645161	4	0.0277778	10	0.0458716	9	0.0401786	11	0.0361842	11	0.088	47	0.0334044
Mobility.4	4	0.0168776	0	0	1	0.00694444	1	0.00458716	8	0.0357143	11	0.0361842	9	0.072	34	0.0241649
Mobility.5	1	0.00421941	0	0	0	0	0	0	0	0	1	0.00328947	5	0.04	7	0.00497512
Self-Care.1	232	0.978903	151	0.974194	138	0.958333	203	0.931193	204	0.910714	272	0.894737	102	0.816	1302	0.925373
Self-Care.2	3	0.0126582	3	0.0193548	2	0.0138889	14	0.0642202	17	0.0758929	24	0.0789474	15	0.12	78	0.0554371
Self-Care.3	2	0.00843882	1	0.00645161	3	0.0208333	1	0.00458716	1	0.00446429	6	0.0197368	2	0.016	16	0.0113717
Self-Care.4	0	0	0	0	1	0.00694444	0	0	1	0.00446429	2	0.00657895	3	0.024	7	0.00497512
Self-Care.5	0	0	0	0	0	0	0	0	1	0.00446429	0	0	3	0.024	4	0.00284293
Usual Activities.1	196	0.827004	138	0.890323	119	0.826389	172	0.788991	187	0.834821	253	0.832237	81	0.648	1146	0.814499
Usual Activities.2	26	0.109705	13	0.083871	15	0.104167	36	0.165138	24	0.107143	31	0.101974	25	0.2	170	0.120824
Usual Activities.3	9	0.0379747	3	0.0193548	8	0.0555556	8	0.0366972	7	0.03125	9	0.0296053	9	0.072	53	0.0376688
Usual Activities.4	4	0.0168776	1	0.00645161	1	0.00694444	2	0.00917431	6	0.0267857	10	0.0328947	4	0.032	28	0.0199005
Usual Activities.5	2	0.00843882	0	0	1	0.00694444	0	0	0	0	1	0.00328947	6	0.048	10	0.00710732
Pain/Discomfort.1	133	0.561181	91	0.587097	53	0.368056	90	0.412844	82	0.366071	114	0.375	44	0.352	607	0.431414
Pain/Discomfort.2	90	0.379747	54	0.348387	72	0.5	91	0.417431	107	0.477679	152	0.5	64	0.512	630	0.447761
Pain/Discomfort.3	11	0.0464135	6	0.0387097	14	0.0972222	29	0.133028	24	0.107143	23	0.0756579	14	0.112	121	0.0859986
Pain/Discomfort.4	1	0.00421941	4	0.0258065	4	0.0277778	7	0.0321101	10	0.0446429	11	0.0361842	2	0.016	39	0.0277186
Pain/Discomfort.5	2	0.00843882	0	0	1	0.00694444	1	0.00458716	1	0.00446429	4	0.0131579	1	0.008	10	0.00710732
Anxiety/Depression.1	156	0.658228	104	0.670968	96	0.666667	156	0.715596	177	0.790179	245	0.805921	95	0.76	1029	0.731343
Anxiety/Depression.2	49	0.206751	34	0.219355	27	0.1875	49	0.224771	35	0.15625	45	0.148026	24	0.192	263	0.186923
Anxiety/Depression.3	20	0.0843882	10	0.0645161	15	0.104167	11	0.0504587	9	0.0401786	11	0.0361842	5	0.04	81	0.0575693
Anxiety/Depression.4	10	0.0421941	5	0.0322581	4	0.0277778	2	0.00917431	3	0.0133929	2	0.00657895	1	0.008	27	0.0191898
Anxiety/Depression.5	2	0.00843882	2	0.0129032	2	0.0138889	0	0	0	0	1	0.00328947	0	0	7	0.00497512

## Sheet: Table 5 weighted
rownames	18-29.n	18-29.prop	30-39.n	30-39.prop	40-49.n	40-49.prop	50-59.n	50-59.prop	60-69.n	60-69.prop	70-79.n	70-79.prop	80+.n	80+.prop	All.n	All.prop
Mobility.1	289.683	0.914972	252.246	0.925982	222.261	0.816448	222.693	0.842489	176.92	0.822933	116.863	0.750229	38.55	0.565189	1319.22	0.843201
Mobility.2	12.807	0.0404513	13.2002	0.0484571	32.5411	0.119536	29.9312	0.113235	24.196	0.112546	24.3901	0.156578	14.8036	0.217039	151.869	0.0970699
Mobility.3	0.888504	0.00280636	6.9629	0.0255604	12.0762	0.0443605	10.6952	0.0404619	7.21772	0.0335729	7.52412	0.048303	6.10952	0.0895728	51.4742	0.0329007
Mobility.4	12.3363	0.0389645	0	0	5.35088	0.0196558	1.00812	0.0038139	6.6533	0.0309475	6.26231	0.0402025	4.98284	0.0730543	36.5937	0.0233896
Mobility.5	0.888504	0.00280636	0	0	0	0	0	0	0	0	0.730203	0.00468772	3.76133	0.0551455	5.38003	0.00343875
Self-Care.1	307.77	0.972099	255.725	0.938753	254.846	0.936145	247.178	0.935122	197.67	0.919453	135.01	0.866731	55.3022	0.810796	1453.5	0.929032
Self-Care.2	2.66551	0.00841908	9.72148	0.035687	3.34079	0.0122719	15.6699	0.059282	15.0395	0.0699554	15.6044	0.100177	8.16938	0.119773	70.2109	0.0448766
Self-Care.3	6.16815	0.0194823	6.9629	0.0255604	8.69167	0.0319277	1.47922	0.00559617	0.630043	0.00293061	3.74135	0.0240186	0.838274	0.0122901	28.5116	0.0182237
Self-Care.4	0	0	0	0	5.35088	0.0196558	0	0	1.2431	0.00578223	1.41336	0.00907343	1.97376	0.0289377	9.98111	0.00637961
Self-Care.5	0	0	0	0	0	0	0	0	0.403817	0.00187833	0	0	1.92371	0.0282038	2.32753	0.00148768
Usual Activities.1	247.34	0.78123	223.236	0.819486	205.069	0.753293	194.473	0.735729	182.055	0.84682	125.749	0.807279	42.8917	0.628843	1220.81	0.780305
Usual Activities.2	38.3712	0.121196	37.5621	0.137888	40.3644	0.148274	56.9462	0.215438	20.3467	0.0946418	17.129	0.109964	13.6986	0.200837	224.418	0.143441
Usual Activities.3	16.7788	0.0529963	9.72148	0.035687	22.617	0.0830807	10.4205	0.0394225	8.8703	0.0412597	5.79083	0.0371757	5.04373	0.073947	79.2426	0.0506494
Usual Activities.4	7.94516	0.025095	1.89023	0.00693893	2.54583	0.00935177	2.48734	0.00941007	3.71464	0.0172785	6.37002	0.040894	2.39832	0.0351622	27.3515	0.0174822
Usual Activities.5	6.16815	0.0194823	0	0	1.63369	0.00600115	0	0	0	0	0.730203	0.00468772	4.17504	0.0612111	12.7071	0.00812197
Pain/Discomfort.1	164.822	0.520593	131.428	0.482465	83.6398	0.30724	102.164	0.386504	81.7534	0.380272	51.9567	0.333549	23.3237	0.341952	639.087	0.408484
Pain/Discomfort.2	125.934	0.397764	118.933	0.436598	142.314	0.522771	106.579	0.403207	97.1514	0.451895	80.5169	0.516899	34.3716	0.503928	705.8	0.451125
Pain/Discomfort.3	14.4007	0.0454848	10.7378	0.0394181	26.0437	0.0956683	45.6357	0.172649	21.6838	0.100861	12.9448	0.0831022	8.755	0.128359	140.202	0.0896124
Pain/Discomfort.4	0.888504	0.00280636	11.3099	0.0415182	14.8813	0.0546645	8.94124	0.0338264	13.155	0.0611899	7.84406	0.0503569	1.11585	0.0163596	58.1359	0.0371586
Pain/Discomfort.5	10.5593	0.0333518	0	0	5.35088	0.0196558	1.00812	0.0038139	1.2431	0.00578223	2.50679	0.016093	0.641236	0.00940128	21.3094	0.0136203
Anxiety/Depression.1	191.378	0.604473	163.684	0.600876	174.749	0.641917	177.006	0.669647	163.103	0.758666	122.478	0.78628	51.3852	0.753367	1043.78	0.667154
Anxiety/Depression.2	60.17	0.190048	59.5513	0.21861	47.0254	0.172742	67.3878	0.254941	37.411	0.174015	25.723	0.165135	14.0907	0.206586	311.359	0.199011
Anxiety/Depression.3	45.375	0.143318	23.0697	0.0846875	33.1455	0.121756	17.9172	0.0677841	10.5749	0.0491884	5.42439	0.0348232	2.09027	0.0306458	137.597	0.0879475
Anxiety/Depression.4	17.9033	0.056548	17.5527	0.0644351	10.3254	0.0379289	2.01623	0.00762779	3.89789	0.0181308	1.46041	0.00937545	0.641236	0.00940128	53.7972	0.0343854
Anxiety/Depression.5	1.77701	0.00561272	8.55136	0.0313916	6.98457	0.0256569	0	0	0	0	0.683159	0.00438571	0	0	17.9961	0.0115025

## Sheet: Table 6 unweighted
rownames	utility.n	utility.Mean	utility.SD	vas.n	vas.Mean	vas.SD
All	3120	0.823603	0.185262	3120	79.4388	17.231
Male	1407	0.83363	0.185279	1407	79.2496	16.6374
Female	1713	0.815367	0.184895	1713	79.5933	17.7047
18-29	691	0.83847	0.17776	691	80.132	15.51
30-39	385	0.864532	0.148163	385	82.1508	14.6634
40-49	368	0.818872	0.186631	368	78.0799	17.7729
50-59	453	0.819444	0.18465	453	79.8153	16.8922
60-69	484	0.829012	0.172774	484	81.7106	16.8664
70-79	500	0.812648	0.189988	500	79.4451	17.1132
80+	239	0.741812	0.239979	239	69.5595	22.6305
Below upper secondary education	282	0.711638	0.257885	282	70.7216	22.146
Upper secondary education	1215	0.805808	0.195297	1215	77.7988	18.536
Higher education, short	761	0.842647	0.157565	761	81.0268	14.9674
Higher education, long	862	0.8685	0.141574	862	83.1517	13.7897

## Sheet: Table 6 weighted
rownames	utility.n	utility.Mean	utility.SD	vas.n	vas.Mean	vas.SD
All	3120	0.805165	0.200933	3120	77.936	18.2857
Male	1564.53	0.81436	0.204255	1564.53	77.9	17.7771
Female	1555.47	0.795916	0.197169	1555.47	77.972	18.7872
18-29	615.044	0.820068	0.198248	615.044	78.9045	16.0735
30-39	532.73	0.838626	0.177098	532.73	80.7718	15.7914
40-49	530.68	0.787989	0.210287	530.68	74.9825	20.4692
50-59	516.852	0.799349	0.201562	516.852	78.272	17.8627
60-69	429.013	0.815905	0.183945	429.013	80.1917	17.7128
70-79	321.886	0.792626	0.198962	321.886	78.0017	18.0855
80+	173.796	0.716319	0.254282	173.796	67.8161	23.8952
Below upper secondary education	729.298	0.723946	0.255072	729.298	71.8731	21.7972
Upper secondary education	1281.07	0.80996	0.187548	1281.07	78.1958	18.0598
Higher education, short	779.384	0.844309	0.157613	779.384	81.1093	14.8896
Higher education, long	330.252	0.873546	0.141607	330.252	82.7515	14.0648

[truncated: 4 more sheets: Ark2, Table 7 unweighted, Table 7 weighted, Appendix table, all weights]
